# Supplementary material for: Physiological and iTRAQ-based proteomic analyses reveal the function of exogenous γ-aminobutyric acid (GABA) in improving tea plant (Camellia sinensis L.) tolerance at cold temperature
Source: PubMed Central journal article supplement (PMC6354415; doi:10.1186/s12870-019-1646-9), 2019-01-30

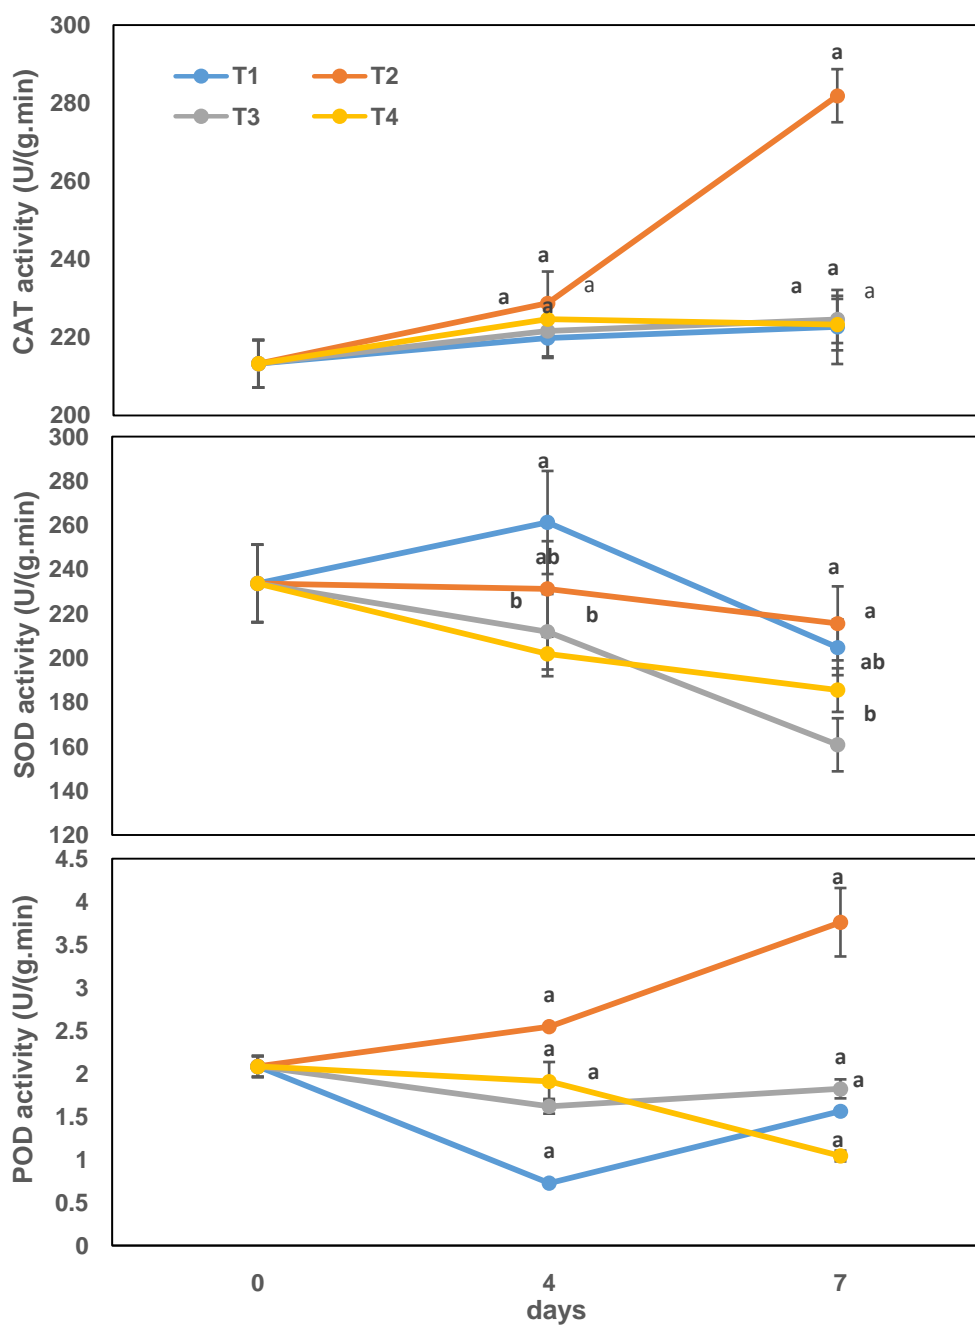

Supplement: 12870_2019_1646_MOESM10_ESM.pdf [file 12870_2019_1646_MOESM10_ESM.pdf]
